# Supplementary material for: Parental time to pregnancy, medically assisted reproduction and pubertal development in boys and girls
Source: PubMed Central journal article supplement — Hum Reprod. 2019 Feb 12;34(4):724–32. doi: 10.1093/humrep/dez008 (PMC6443115; doi:10.1093/humrep/dez008), 2019-02-12
Supplement: dez008_supplementary_table_si.pdf [file dez008_supplementary_table_si.pdf]

**Supplementary Table SI Mean ages in years (SD) at attaining pubertal milestones in the original censored data and the converted continuous data.**

| Pubertal milestones      | Type of data                    |                              |
|--------------------------|---------------------------------|------------------------------|
|                          | Censored data<br>Mean ages (SD) | Continuous<br>Mean ages (SD) |
| Boys                     |                                 |                              |
| Tanner stages—genitals   |                                 |                              |
| Stage 2                  | 10.87 (1.25)                    | 10.92 (1.21)                 |
| Stage 3                  | 12.47 (1.34)                    | 12.46 (1.30)                 |
| Stage 4                  | 13.66 (1.30)                    | 13.66 (1.29)                 |
| Stage 5                  | 15.57 (1.63)                    | 15.60 (1.65)                 |
| Tanner stages—pubic hair |                                 |                              |
| Stage 2                  | 11.32 (1.25)                    | 11.33 (1.21)                 |
| Stage 3                  | 12.73 (1.16)                    | 12.71 (1.14)                 |
| Stage 4                  | 13.51 (1.08)                    | 13.51 (1.06)                 |
| Stage 5                  | 14.71 (1.28)                    | 14.73 (1.29)                 |
| Axillary hair            | 13.25 (1.48)                    | 13.23 (1.45)                 |
| Acne                     | 12.21 (1.33)                    | 12.22 (1.31)                 |
| Voice break              | 12.99 (1.34)                    | 12.99 (1.34)                 |
| First ejaculation        | 13.35 (1.36)                    | 13.34 (1.34)                 |
| Girls                    |                                 |                              |
| Tanner stages—breast     |                                 |                              |
| Stage 2                  | 9.81 (1.44)                     | 9.88 (1.37)                  |
| Stage 3                  | 11.61 (1.23)                    | 11.61 (1.18)                 |
| Stage 4                  | 13.01 (1.30)                    | 12.99 (1.30)                 |
| Stage 5                  | 15.71 (2.03)                    | 15.67 (2.02)                 |
| Tanner stages—pubic hair |                                 |                              |
| Stage 2                  | 11.23 (0.98)                    | 11.24 (0.95)                 |
| Stage 3                  | 12.45 (1.04)                    | 12.44 (1.01)                 |
| Stage 4                  | 13.41 (1.30)                    | 13.39 (1.27)                 |
| Stage 5                  | 15.32 (1.68)                    | 15.29 (1.66)                 |
| Axillary hair            | 11.89 (1.41)                    | 11.91 (1.37)                 |
| Acne                     | 11.37 (1.50)                    | 11.38 (1.47)                 |
| Menarche                 | 12.97 (1.14)                    | 12.97 (1.14)                 |
